# Supplementary material for: Programming of Adiposity in Offspring of Mothers With Type 1 Diabetes at Age 7 Years
Source: Oxford University Press journal article supplement (doi:10.2337/dc09-1766), 2010-04-28
Supplement: dc09-1766_online_appendix.pdf [file dc09-1766_online_appendix.pdf]

**Online Appendix Table A1: Characteristics of mothers and their offspring at birth**

|                                            |                            | Control                | Mothers with type 1 Diabetes | P*                |
|--------------------------------------------|----------------------------|------------------------|------------------------------|-------------------|
| <b>N</b>                                   |                            | 45                     | 100                          |                   |
| <b>Age (years)</b>                         |                            | 30.4 ± 5.1             | 30.0 ± 4.9                   | 0.68              |
| <b>Duration of diabetes (years)</b>        |                            | -                      | 13.0 ± 8.1                   | -                 |
| <b>Parity</b>                              | <b>0</b>                   | 24 (53%)               | 51 (51%)                     | 0.76              |
|                                            | <b>1</b>                   | 14 (31%)               | 36 (36%)                     |                   |
|                                            | <b>&gt;1</b>               | 7 (16%)                | 13 (13%)                     |                   |
| <b>Children (male/ female)</b>             |                            | 21 M/ 24 F             | 47 M/ 53F                    | 0.97              |
| <b>Gestational age at delivery (weeks)</b> |                            | 39.9 ± 1.4             | 37.4 ± 2.1                   | <0.001            |
| <b>Maternal smoking history (%)</b>        | <b>Current</b>             | 11 (24%)               | 18 (18%)                     | 0.47              |
|                                            | <b>ex-smoker</b>           | 8 (18%)                | 13 (13%)                     |                   |
|                                            | <b>non-smoker</b>          | 26 (58%)               | 67 (68%)                     |                   |
| <b>Delivery</b>                            | <b>Vaginal</b>             | 30 (67%)               | 34 (34%)                     | <0.001            |
|                                            | <b>Emergency Caesarean</b> | 13 (29%)               | 33 (33%)                     |                   |
|                                            | <b>Elective Caesarean</b>  | 2 (4%)                 | 33 (33%)                     |                   |
| <b>Birth weight (kg)</b>                   | <b>Males</b>               | 3.44 ± 0.54            | 3.74 ± 0.74                  | 0.02 <sup>†</sup> |
|                                            | <b>females</b>             | 3.44 ± 0.39            | 3.55 ± 0.76                  | 0.01 <sup>†</sup> |
| <b>Z weight of offspring<sup>‡</sup></b>   |                            | 0.22 ± 1.01            | 1.78 ± 1.68 <sup>α</sup>     | <0.001            |
| <b>Cord Insulin</b>                        |                            | 22 [14 -58] (n=14)     | 127 [61- 258] (n=56)         | 0.0002            |
| <b>Cord Leptin</b>                         |                            | 10.6 [4.9-18.5] (n=21) | 31.6 [12.9-54.1] (n=75)      | 0.005             |
| <b>Cord haematocrit</b>                    |                            | 0.52 ± 0.06            | 0.54 ± 0.06                  | 0.30              |
| <b>Cord Adiponectin</b>                    |                            | 22.9 ± 4.6 (n=12)      | 19.2 ± 6.1 (n=55)            | 0.33              |
| <b>Cord CRP (mg/l)</b>                     |                            | 0.15 (0.13-0.20)       | 0.18 (0.14-0.22)             | 0.13              |

Characteristics of mothers with type 1 diabetes and their singleton offspring vs. control mothers and children. Values are given as mean ± standard deviation or median [interquartile range]. <sup>†</sup> Birth weights given as unadjusted, P value for difference dependent on maternal diabetes status, adjusted for gestational age at delivery. <sup>‡</sup> Z weight is standard deviation score compared to standard values for gestational age, gender and maternal parity. <sup>α</sup> n=133: 1 child (gestation at delivery 29 weeks) not included as standardized birth weight not available. P= value of significance in unpaired *t*-test, wilcoxon or  $\chi^2$  as appropriate.

**Online Appendix Table A2: Relationship of measures at birth to adiposity at 7 years in offspring of mothers with type 1 diabetes**

|                                                             |                            | Measures at birth       |                     |                        |                       |                       |               |
|-------------------------------------------------------------|----------------------------|-------------------------|---------------------|------------------------|-----------------------|-----------------------|---------------|
|                                                             |                            | Birth weight<br>(n=100) | Skinfolds<br>(n=38) | Cord insulin<br>(n=61) | Cord leptin<br>(n=75) | Haematocrit<br>(n=50) | CRP(n=73)     |
| <b>Measures of adiposity and glucose tolerance at age 7</b> | <b>BMI</b>                 | 0.19 (P=0.06)           | 0.22 (P=0.18)       | -0.08 (P=0.53)         | <b>0.25</b> (P=0.03)  | 0.25(P=0.07)          | 0.01 (P=0.91) |
|                                                             | <b>Height</b>              | 0.31 (P=0.002)          | 0.04 (P=0.81)       | -0.07 (P=0.58)         | <b>0.23</b> (P=0.046) | 0.24(P=0.10)          | 0.04 (P=0.71) |
|                                                             | <b>Weight</b>              | 0.30 (P=0.003)          | 0.17 (P=0.32)       | -0.05 (P=0.69)         | <b>0.26</b> (P=0.02)  | <b>0.30</b> (P=0.04)  | 0.03 (P=0.83) |
|                                                             | <b>Skin folds</b>          | 0.08 (P=0.47)           | 0.14 (P=0.44)       | -0.13 (P=0.35)         | 0.21 (P=0.09)         | <b>0.33</b> (P=0.02)  | 0.02 (P=0.86) |
|                                                             | <b>Waist circumference</b> | 0.14 (P=0.16)           | 0.16 (P=0.33)       | -0.10 (P=0.43)         | 0.19 (P=0.09)         | <b>0.28</b> (P=0.049) | 0.02 (P=0.87) |

Spearman correlation between measures at birth and age 7. Where available data are standardised using standard deviation scores (Birth weight; BMI, height and weight at age 7) or expressed as log transformed variables (cord insulin, leptin).
